# Supplementary material for: Molecular and Phylogenetic Analysis of Tick-Borne Pathogens in Ticks Parasitizing Native Korean Goats (Capra hircus coreanae) in South Korea
Source: PubMed Central journal article supplement (PMC7168648; doi:10.3390/pathogens9020071), 2020-01-21
Supplement: pathogens-09-00071-s001.pdf [file pathogens-09-00071-s001.pdf]

1 **Supplementary Table S1:** Primers used for the detection of tick-borne pathogens in ticks from native Korean goats (*Capra hircus coreanae*) in the present study.

| Organism               | Gene                                         | Primer   | Sequence 5' to 3'          | Size (bp) | Amplification condition                                                    | Reference                                                    |
|------------------------|----------------------------------------------|----------|----------------------------|-----------|----------------------------------------------------------------------------|--------------------------------------------------------------|
| Invertebrate           | Mitochondrial cytochrome c oxidase subunit I | LCO1490  | GGTCAACAAATCATAAAGATATTGG  | 710       | 95°C/5 min; 35 cycles:<br>95°C/60 s, 40°C/60 s,<br>72°C/30 s; 72°C/10 min  | Folmer et al., 1994                                          |
|                        |                                              | HC02198  | TAAACTTCAGGGTGACCAAAAAATCA |           |                                                                            |                                                              |
| <i>Anaplasma</i> spp.  | 16S rRNA                                     | *        |                            | 429       | 95°C/5 min; 45 cycles:<br>95°C/30 s, 59°C/30 s,<br>72°C/30 s; 72°C/10 min  | Commercial AccuPower® Rickettsiales 3-Plex PCR Kit (Bioneer) |
| <i>Ehrlichia</i> spp.  | 16S rRNA                                     | *        |                            | 340       | 95°C/5 min; 45 cycles:<br>95°C/30 s, 59°C/30 s,<br>72°C/30 s; 72°C/10 min  | Commercial AccuPower® Rickettsiales 3-Plex PCR Kit (Bioneer) |
| <i>Rickettsia</i> spp. | 16S rRNA                                     | *        |                            | 252       | 95°C/5 min; 45 cycles:<br>95°C/30 s, 59°C/30 s,<br>72°C/30 s; 72°C/10 min  | Commercial AccuPower® Rickettsiales 3-Plex PCR Kit (Bioneer) |
| <i>Rickettsia</i> spp. | <i>gltA</i>                                  | Rsf877   | GGGGCCTGCTCACGGCGG         | 380       | 95°C/10 min; 35 cycles:<br>95°C/60 s, 51°C/60 s, 72°C/60 s;<br>72°C/10 min | Reis et al., 2011                                            |
|                        |                                              | Rsf1258  | ATTGCAAAAAGTACAGTGAACA     |           |                                                                            |                                                              |
| <i>Coxiella</i> spp.   | 16S rRNA                                     | Cox16SF1 | CGTAGGAATCTACCTTRTAGWGG    | 1321–1429 | 93°C/3 min; 30 cycles:<br>93°C/30 s, 56°C/30 s,<br>72°C/60 s; 72°C/5 min   | Seo et al., 2016                                             |
|                        |                                              | Cox16SR2 | GCCTACCCGCTTCTGGTACAATT    |           |                                                                            |                                                              |
|                        |                                              | Cox16SF2 | TGAGAACTAGCTGTTGGRRAGT     | 624–627   | 93°C/3 min; 30 cycles:<br>93°C/30 s, 56°C/30 s,                            |                                                              |

|                                                   |           |          |                         |     |                                                                                  |                                                             |
|---------------------------------------------------|-----------|----------|-------------------------|-----|----------------------------------------------------------------------------------|-------------------------------------------------------------|
|                                                   |           | Cox16SR2 | GCCTACCCGCTTCTGGTACAATT |     | 72°C/60 s; 72°C/5 min                                                            |                                                             |
| <i>Bartonella</i> spp.                            | ITS-1     | QHVE-OF  | TTCAGATGATGATCCCAAGC    | 736 | 94°C/10 min; 35 cycles: 94°C/60 s, 55°C/60 s, 72°C/120 s; 72°C/5 min             | Ko et al., 2013                                             |
|                                                   |           | QHVE-OR  | AACATGTCTGAATATATCTTC   |     |                                                                                  |                                                             |
|                                                   |           | QHVE-IF  | CCGGAGGGCTTGTAGCTCAG    | 484 |                                                                                  |                                                             |
|                                                   |           | QHVE-IR  | CACAATTTCAATAGAAC       |     |                                                                                  |                                                             |
| Severe fever with thrombocytopenia syndrome virus | S segment | NP-2F    | CATCATTGTCTTTGCCCTGA    | 461 | 50°C/30 min; 95°C/15 min; 40 cycles: 95°C/20 s, 52°C/40 s, 72°C/30 s; 72°C/5 min | Yoshikawa et al., 2014                                      |
|                                                   |           | NP-2R    | AGAAGACAGAGTTCACAGCA    |     |                                                                                  |                                                             |
|                                                   |           | N2F      | AAYAAGATCGTCAAGGCATCA   | 346 |                                                                                  |                                                             |
|                                                   |           | N2R      | TAGTCTTGGTGAAGGCATCTT   |     |                                                                                  |                                                             |
| <i>Babesia</i> spp. and <i>Theileria</i> spp.     | 18S rRNA  | *        |                         | 676 | 95°C/5 min; 35 cycles: 95°C/30 s, 59°C/30 s, 72°C/30 s; 72°C/5 min               | Commercial AccuPower® Babesia & Theileria PCR Kit (Bioneer) |
| <i>Babesia</i> spp. and <i>Theileria</i> spp.     | 18S rRNA  | BJ1      | GTCTTGTAATTGGAATGATGG   | 452 | 95°C/5 min; 40 cycles: 94°C/30 s, 54°C/30 s, 72°C/40 s; 72°C/5 min               | Casati et al., 2006                                         |
|                                                   |           | BN2      | TAGTTTATGGTTAGGACTACG   |     |                                                                                  |                                                             |

2 \* Commercial PCR kits were used for the detection of these pathogens.
